# Supplementary material for: Design and validation of a GMP stem cell manufacturing protocol for MPSII hematopoietic stem cell gene therapy
Source: PubMed Central journal article supplement (PMC11214401; doi:10.1016/j.omtm.2024.101271), 2024-05-21
Supplement: mmc1.pdf [file mmc1.pdf]

**OMTM, Volume 32**

## **Supplemental information**

### **Design and validation of a GMP stem cell manufacturing protocol for MPSII hematopoietic stem cell gene therapy**

**Stuart Ellison, Karen Buckland, Yuko Learmonth, Victoria Day, Spandan Kalra, Lauren Howe, Francisco José Roman-Rodriguez, Jose Bonafont, Laura Booth, Rebecca Holley, Jon Smythe, Simon Jones, Adrian Thrasher, Claire Booth, and Brian W. Bigger**

**Table S1.** Current specification for batch release testing of a cryopreserved medicinal product for proposed clinical trial

| Test                           | Method                | Acceptance Criteria                  |
|--------------------------------|-----------------------|--------------------------------------|
| Mycoplasma                     | PCR                   | Not Detected                         |
| Total Viable Cell Count/ml     | Trypan Blue           | 0.5 to 17.5 x 10 <sup>6</sup> TNC/ml |
| Total Viable Cell Count        | Trypan Blue           | Record                               |
| CD34+ Cell Purity and Identity | FACS                  | ≥ 35% CD34+ cells                    |
| CD34+ Cell Dose                | Calculated            | Record                               |
| Cell Viability                 | Trypan Blue           | ≥ 70% viable cells                   |
| Sterility                      | BacTec                | No Growth                            |
| Bacterial Endotoxins           | Kinetic Turbidimetric | ≤ 5 EU/kg/hr                         |
| Vector Copy Number             | ddPCR                 | ≥ 0.5 copy/cell                      |

**Table S2:** Small scale hCD34+ stem cell transduction optimisation performed at GOSH. Low vector dose range.

| Methodology    | Batch           | MOI  | Vector Conc. (x 10 <sup>8</sup> IG/ml) | Healthy Donor Cells | Batch Testing       |             |                      |                             |                      |           |
|----------------|-----------------|------|----------------------------------------|---------------------|---------------------|-------------|----------------------|-----------------------------|----------------------|-----------|
|                |                 |      |                                        |                     | Test Attribute      | Viability   | CD34%                | Clonogenicity               | VCN (liquid culture) | Pass/Fail |
|                |                 |      |                                        |                     | Method              | Trypan Blue | Flow Cytometry       | CFU assay                   | ddPCR                |           |
|                |                 |      |                                        |                     | Acceptance Criteria | ≥ 70%       | For information only | ≥ 4 CFUs/ 1000 cells plated | ≥ 0.5                |           |
| GMP Experiment | 21-SU-MPSII-01a | 25   | 0.5                                    | A                   |                     | 94.01       | 99.2                 | 366                         | 0.93                 | Pass      |
|                |                 | 12.5 | 0.25                                   | A                   |                     | 92.87       | 99.0                 | 346                         | 0.85                 | Pass      |
|                |                 | 25   | 0.5                                    | B                   |                     | 93.01       | 99.1                 | 406                         | 0.839                | Pass      |
|                |                 | 12.5 | 0.25                                   | B                   |                     | 92.94       | 99.2                 | 374                         | 0.827                | Pass      |
|                |                 | N/A  | N/A                                    | A                   |                     | 92.87       | 99.0                 | 336                         | 0.01                 | N/A       |
|                |                 | N/A  | N/A                                    | B                   |                     | 99.6        | 99.6                 | 398                         | 0                    | N/A       |

**Table S3:** Small scale hCD34+ stem cell transduction optimisation performed at GOSH. High vector dose range.

\*A minimum of  $3.0 \times 10^6$  CD34+ cells/kg after transduction is required for infusion into the patient

| Methodology    | Batch           | MOI** | Vector Conc. ( $\times 10^8$ IG/ml)* | Healthy Donor Cells | Batch Testing       |             |                      |                      |                   |           |
|----------------|-----------------|-------|--------------------------------------|---------------------|---------------------|-------------|----------------------|----------------------|-------------------|-----------|
|                |                 |       |                                      |                     | Test Attribute      | Viability   | CD34%                | VCN (liquid culture) | VCN (pooled CFUs) | Pass/Fail |
|                |                 |       |                                      |                     | Method              | Trypan Blue | Flow Cytometry       | ddPCR                | ddPCR             |           |
|                |                 |       |                                      |                     | Acceptance Criteria | $\geq 70\%$ | For information only | $\geq 0.5$           | $\geq 0.5$        |           |
| GMP Experiment | 21-SU-MPSII-01b | 25    | 0.5                                  | A                   |                     | 91.6        | 99.3                 | 0.92                 | 1.1               | Pass      |
|                |                 | 50    | 1.0                                  | A                   |                     | 89.13       | 99.5                 | 1.19                 | 1.08              | Pass      |
|                |                 | 100   | 2.0                                  | A                   |                     | 92.46       | 99.0                 | 1.63                 | 1.56              | Pass      |
|                |                 | 25    | 0.5                                  | C                   |                     | 91.07       | 99.2                 | 0.99                 | 1.5               | Pass      |
|                |                 | 50    | 1.0                                  | C                   |                     | 95.03       | 99.5                 | 1.08                 | 1.27              | Pass      |
|                |                 | 100   | 2.0                                  | C                   |                     | 92.53       | 99.5                 | 1.92                 | 2.09              | Pass      |

\*Cells from the same health donor A were used in both assays (table S2 and S3).\*\*MOI = Multiplicity of infection

**Table S4:** UoM/Barnsley vs GOSH equivalent vector concentration comparison.

| UoM/Barnsley MOI | GOSH MOI |
|------------------|----------|
| 25               | 18       |
| 50               | 35       |
| 100              | 71       |

**Table S5. Individual VCN counts in single picked colonies from CFU assay, determined by QPCR.** Left panel) Large scale transduction performed at Manchester research lab with LV IDS.ApoEII at MOI25 + TE with IL3 in the media, cultured in reconnection-coated T175 flask. Right panel) 'At scale' transduction performed at NHSBT Barnsley research and development lab with LV IDS.ApoEII at MOI25 + TE with IL3 in the media, cultured in reconnection-coated T175 flask.

| BFU-E                                                                                                                                                                                    | CFU-GM | BFU-E | CFU-GM  |
|------------------------------------------------------------------------------------------------------------------------------------------------------------------------------------------|--------|-------|---------|
| 1.52                                                                                                                                                                                     | 1.51   | 1.41  | 28.00** |
| 5.96                                                                                                                                                                                     | 6.42   | 1.89  | 1.10    |
| 1.90                                                                                                                                                                                     | 1.88   | 1.34  | 6.28    |
| 4.92                                                                                                                                                                                     | 4.49   | 2.26  | 10.24   |
| 3.86                                                                                                                                                                                     | 1.35   | 1.25  | 8.43    |
| 3.56                                                                                                                                                                                     | 5.73   | 2.69  | 3.51    |
| 1.51                                                                                                                                                                                     | 4.55   | 4.27  | 2.41    |
| 6.42                                                                                                                                                                                     | 2.76   | 10.20 | 8.07    |
| 1.88                                                                                                                                                                                     | 1.31   | 0.15* | 5.53    |
| 4.49                                                                                                                                                                                     | 1.29   | 7.26  | 4.62    |
| 1.35                                                                                                                                                                                     | 7.88   | 5.63  | 2.80    |
| 5.73                                                                                                                                                                                     | 1.62   | 2.21  | 5.26    |
| * VCN below 0.3 classed as 0 (colony with no copies).<br>**VCN assay is accurate up to approximately 12 vector copies. VCNs above this cannot be accurately determined with this method. |        | 3.58  | 4.07    |
|                                                                                                                                                                                          |        | 2.49  | 3.32    |
|                                                                                                                                                                                          |        | 4.06  | 0.82    |
|                                                                                                                                                                                          |        | 3.21  | 3.30    |
|                                                                                                                                                                                          |        | 1.28  | -       |

**Table S6. Overview of sampling timepoints and volumes taken for sterility testing performed for the NHSBT GMP validation runs.**

| Reagent / Sample                                                                                                                  | No. of Replicates/micro-organism | Inoculum volume per broth | Comments                                                      |
|-----------------------------------------------------------------------------------------------------------------------------------|----------------------------------|---------------------------|---------------------------------------------------------------|
| Final product – CD11b-IDS.ApoEII LV Gene Modified Autologous CD34+ Cells in final container and condition as presented to patient | 3                                | 600µl                     | Cryopreserved in pilot vial 1% of final product volume        |
| Fresh HPC Apheresis as collected from donor                                                                                       | 1                                | 2-4ml                     | 1% of starting material volume depending on received volume   |
| CD34- cell fraction post selection                                                                                                | 1                                | 5ml                       | 1% of total selected cell product volumes (+ and – fractions) |
| Day 3 transduction media supernatant                                                                                              | 1                                | 5ml                       | >1% of total supernatant volume                               |
| Day 4 transduction media supernatant                                                                                              | 1                                | 5ml                       | >1% of total supernatant volume                               |
| Day 4 wash buffer supernatant                                                                                                     | 1                                | 5ml                       | >1% of total supernatant volume                               |
